# Supplementary material
Source: PubMed Central journal article supplement (PMC3057793)
Supplement: supp_M110.179002_jbc.M110.179002-2.pdf [file supp_M110.179002_jbc.M110.179002-2.pdf]

## SUPPLEMENTAL TABLE 1

## Primers for cDNA cloning by RT-PCR

Start atg codons and stop codons are underlined in external primers.

|                    | <u>EXTERNAL PRIMERS</u>                                            | <u>UTR PRIMERS</u>                            | <u>INTERNAL PRIMERS</u>                |
|--------------------|--------------------------------------------------------------------|-----------------------------------------------|----------------------------------------|
| <b>Canine</b>      | tca atc <u>atg</u> gct tgt ggt ctg gtc (sense)                     |                                               | sense: caa tca tgg ctt gtg gtc tg      |
| <b>Galectin-1</b>  | att tct aga <u>tta</u> gtc aaa ggc cag gca ctt (antisense)         |                                               | antisense : ttc aaa gcg agg gtt gaa gt |
| <b>Canine</b>      | gcc acc <u>atg</u> tcg ggg aaa ttt gag gtt (sense)                 |                                               | sense: gat tgc tgg tga tgc tga tg      |
| <b>Galectin-2</b>  | <u>tta</u> ttc tat ctt gaa gga gga gag (antisense)                 |                                               | antisense: cac atg tgc tta tcc cgt tg  |
| <b>Canine</b>      | ata ata ggt acc acc <u>atg</u> gca gac agt ttt tca ctt             |                                               | sense: tcc act tta acc cac gct tc      |
| <b>Galectin-3</b>  | tta tta tct aga <u>tta</u> tat cat agc ata tga agc act (antisense) |                                               | antisense: ttc cca gtt tgc tga ttt cc  |
| <b>Canine</b>      | aat gaa ttc aac <u>atg</u> gcc tat gtc cct gca (sense)             |                                               | sense: gct tcg tac cct tca caa gc      |
| <b>Galectin-4</b>  | aat gtc gac <u>tta</u> gac ttg gat ata gga (antisense)             |                                               | antisense: gat caa aga att gcc cag ga  |
| <b>Canine</b>      | atc gga tcc acc <u>atg</u> gcg ggr tcr gtg gcc gac (sense)         |                                               | sense: act cct tgg gct ctc cag tt      |
| <b>Galectin-5</b>  | <u>tca</u> gcc aag ctt agt gat ctg gag (antisense)                 |                                               | antisense: tga gta act gcc ggt ctg tg  |
| <b>Canine</b>      | cca gcc <u>atg</u> gca ggg agc tct (sense)                         | 5' UTR sense : gcc tgc cct cgc agc cca gc     | sense: gtg gtc ttc aac acc ctg ga      |
| <b>Galectin-7</b>  | aca tgc ggc cgc <u>tca</u> gaa gac gct cac gga ctc (antisense)     | 3' UTR antisense : gag gct tta ttt gcg ctg    | antisense: agt ggt ggt act cgg agt cg  |
| <b>Canine</b>      | aga gtg <u>atg</u> ttg tcc tta aaa aac (sense)                     |                                               | sense: aat cca cgc ttc aag tgg tc      |
| <b>Galectin-8</b>  | <u>cta</u> cca gct cct tac ttc cag taa (antisense)                 |                                               | antisense: gcc ata aat gcc cag agt gt  |
| <b>Canine</b>      | gtg aag <u>atg</u> gcc ttc agc agc ttc cag (sense)                 | 5' UTR sense : tgg cca cag agg tgg tgt ga     | sense: gta ccc ctc caa gag cat c       |
| <b>Galectin-9</b>  | <u>cta</u> tgt ctg cac gtg ggt cag ttg (antisense)                 | 3' UTR antisense : gtg tca tcc cca ggg ccg cg | antisense: aca cat gat cca cac cga ga  |
| <b>Canine</b>      | gcc acc <u>atg</u> tca cct gga gaa aaa ctg (sense)                 | 5' UTR sense : gtt gga ggc act cca ctc cca tg | sense: aat ggt ccc tga aga tgc ac      |
| <b>Galectin-12</b> | <u>tca</u> gta gtg gac aca gta gac ctg (antisense)                 | 3' UTR antisense : cgg agt ccc tgg ctc act tg | antisense: cct tca ttt cct cgt ttc ca  |

**Supplemental Table 2**  
**Concentration Dependent Ranking Analysis of Canine Galectin 1**

| Order | No. | Glycan Structure                                                                                              | Galectin Concentration |       |          |      |         |      | AVG RANK |
|-------|-----|---------------------------------------------------------------------------------------------------------------|------------------------|-------|----------|------|---------|------|----------|
|       |     |                                                                                                               | 200 µg/ml              |       | 10 µg/ml |      | 1 µg/ml |      |          |
|       |     |                                                                                                               | RFU <sub>Max</sub>     | 19493 | 27843    | 6663 | RFU     | Rank |          |
| 1     | 384 | Galb1-4GlcNacb1-2(Galb1-4GlcNacb1-4)Mana1-3(Galb1-4GlcNacb1-2(Galb1-4GlcNacb1-6)Mana1-6)Manb1-4GlcNacb1-4GlcN | 19494                  | 100   | 26979    | 97   | 5777    | 87   | 95       |
| 2     | 358 | Gala1-3Galb1-4GlcNacb1-2Mana1-3(Gala1-3Galb1-4GlcNacb1-2Mana1-6)Manb1-4GlcNacb1-4GlcNacb-Sp20                 | 13696                  | 70    | 24582    | 88   | 6663    | 100  | 86       |
| 3     | 364 | Galb1-4GlcNacb1-2(Galb1-4GlcNacb1-4)Mana1-3(Galb1-4GlcNacb1-2Mana1-6)Manb1-4GlcNacb1-4GlcNacb-Sp21            | 7286                   | 37    | 27844    | 100  | 5336    | 80   | 72       |
| 4     | 283 | [3OSO3]Galb1-4[6OSO3]GlcNacb-Sp0                                                                              | 13585                  | 70    | 26516    | 95   | 3433    | 52   | 72       |
| 5     | 33  | [3OSO3]Galb1-4[6OSO3]GlcNacb-Sp8                                                                              | 8572                   | 44    | 24982    | 90   | 3401    | 51   | 62       |
| 6     | 51  | Galb1-4GlcNacb1-2Mana1-3(Galb1-4GlcNacb1-2Mana1-6)Manb1-4GlcNacb1-4GlcNacb-Sp13                               | 16769                  | 86    | 4987     | 18   | 4962    | 74   | 59       |
| 7     | 142 | Neu5Aca2-3Galb1-4GlcNacb1-2Mana1-3(Neu5Aca2-3Galb1-4GlcNacb1-2Mana1-6)Manb1-4GlcNacb1-4GlcNacb-Sp12           | 13773                  | 71    | 19265    | 69   | 1339    | 20   | 53       |
| 8     | 383 | Galb1-3GlcNacb1-3(Galb1-3GlcNacb1-3Galb1-4(Fuca1-3)GlcNacb1-6)Galb1-4Glc-Sp21                                 | 16337                  | 84    | 14133    | 51   | 1039    | 16   | 50       |
| 9     | 31  | [3OSO3]Galb1-3GlcNacb-Sp8                                                                                     | 11827                  | 61    | 13244    | 48   | 2776    | 42   | 50       |
| 10    | 295 | Galb1-4GlcNAca1-6Galb1-4GlcNacb-Sp0                                                                           | 12870                  | 66    | 14508    | 52   | 1665    | 25   | 48       |
| 11    | 379 | Galb1-3GlcNacb1-3(Galb1-3GlcNacb1-3Galb1-4GlcNacb1-6)Galb1-4Glc-Sp0                                           | 12201                  | 63    | 17510    | 63   | 687     | 10   | 45       |
| 12    | 34  | [3OSO3]Galb1-4GlcNacb-Sp0                                                                                     | 9714                   | 50    | 14533    | 52   | 1312    | 20   | 41       |
| 13    | 234 | Neu5Aca2-3Galb1-4GlcNacb1-3Galb1-4GlcNacb1-3Galb1-4GlcNacb-Sp0                                                | 14340                  | 74    | 9805     | 35   | 442     | 7    | 38       |
| 14    | 35  | [3OSO3]Galb1-4GlcNacb-Sp8                                                                                     | 7023                   | 36    | 13685    | 49   | 1986    | 30   | 38       |
| 15    | 22  | Galb1-4GlcNacb1-3(Galb1-4GlcNacb1-6)GalNAca-Sp8                                                               | 12044                  | 62    | 8393     | 30   | 835     | 13   | 35       |
| 16    | 145 | Galb1-4GlcNacb1-3Galb1-4GlcNacb1-3Galb1-4GlcNacb-Sp0                                                          | 12823                  | 66    | 8535     | 31   | 412     | 6    | 34       |
| 17    | 343 | Galb1-4GlcNacb1-2Mana1-3Manb1-4GlcNacb1-4GlcNacb-Sp12                                                         | 10517                  | 54    | 10468    | 38   | 395     | 6    | 32       |
| 18    | 293 | Galb1-4GlcNacb1-3(Galb1-4GlcNacb1-6)Galb1-4GlcNacb-Sp0                                                        | 13761                  | 71    | 2706     | 10   | 1142    | 17   | 32       |
| 19    | 223 | Neu5Aca2-3Galb1-3GlcNacb1-3Galb1-4GlcNacb-Sp0                                                                 | 11729                  | 60    | 6888     | 25   | 623     | 9    | 31       |
| 20    | 347 | Galb1-4GlcNacb1-2Mana1-3(Galb1-4GlcNacb1-2Mana1-6)Manb1-4GlcNacb1-4(Fuca1-6)GlcNacb-Sp22                      | 9682                   | 50    | 11290    | 41   | 173     | 3    | 31       |
| 21    | 28  | [3OSO3]Galb1-4[6OSO3]Glc-Sp8                                                                                  | 13300                  | 68    | 1609     | 6    | 1237    | 19   | 31       |
| 22    | 27  | [3OSO3]Galb1-4[6OSO3]Glc-Sp0                                                                                  | 6314                   | 32    | 9350     | 34   | 1532    | 23   | 30       |
| 23    | 345 | Galb1-4GlcNacb1-2Mana1-3(Mana1-6)Manb1-4GlcNacb1-4GlcNacb-Sp12                                                | 11045                  | 57    | 7566     | 27   | 213     | 3    | 29       |
| 24    | 294 | Galb1-4GlcNacb1-3(GlcNacb1-6)Galb1-4GlcNacb-Sp0                                                               | 13068                  | 67    | 3916     | 14   | 181     | 3    | 28       |
| 25    | 281 | Neu5Aca2-3Galb1-3GlcNacb1-3Galb1-3GlcNacb-Sp0                                                                 | 12946                  | 66    | 2712     | 10   | 309     | 5    | 27       |

|    |     |                                                                                                     |       |    |      |    |     |   |    |
|----|-----|-----------------------------------------------------------------------------------------------------|-------|----|------|----|-----|---|----|
| 26 | 394 | Galb1-4GlcNAcb1-2Mana1-3(GlcNAcb1-2Mana1-6)Manb1-4GlcNAcb1-4GlcNAc-Sp12                             | 13427 | 69 | 1492 | 5  | 409 | 6 | 27 |
| 27 | 146 | Galb1-4GlcNAcb1-3Galb1-4GlcNAcb-Sp0                                                                 | 10195 | 52 | 4095 | 15 | 431 | 6 | 24 |
| 28 | 4   | Galb1-3GlcNAcb1-2Mana1-3(Galb1-3GlcNAcb1-2Mana1-6)Manb1-4GlcNAcb1-4GlcNAcb-Sp19                     | 11388 | 58 | 1276 | 5  | 155 | 2 | 22 |
| 29 | 356 | Fuca1-2Galb1-4GlcNAcb1-2Mana1-3(Fuca1-2Galb1-4GlcNAcb1-2Mana1-6)Manb1-4GlcNAcb1-4GlcNAcb-Sp20       | 10215 | 52 | 2640 | 9  | 193 | 3 | 22 |
| 30 | 50  | Galb1-4GlcNAcb1-2Mana1-3(Galb1-4GlcNAcb1-2Mana1-6)Manb1-4GlcNAcb1-4GlcNAcb-Sp12                     | 11524 | 59 | 425  | 2  | 93  | 1 | 21 |
| 31 | 147 | Galb1-4GlcNAcb1-3Galb1-4Glc-Sp0                                                                     | 8556  | 44 | 1820 | 7  | 92  | 1 | 17 |
| 32 | 255 | Neu5Gca2-3Galb1-3GlcNAcb-Sp0                                                                        | 8369  | 43 | 1814 | 7  | 105 | 2 | 17 |
| 33 | 344 | Galb1-4GlcNAcb1-2Mana1-6Manb1-4GlcNAcb1-4GlcNAc-Sp12                                                | 8582  | 44 | 1055 | 4  | 68  | 1 | 16 |
| 34 | 148 | Galb1-4GlcNAcb1-3Galb1-4Glc-Sp8                                                                     | 7194  | 37 | 2201 | 8  | 156 | 2 | 16 |
| 35 | 381 | Fuca1-2Galb1-3(Fuca1-4)GlcNAcb1-3(Galb1-4GlcNAcb1-6)Galb1-4Glc-Sp21                                 | 8552  | 44 | 65   | 0  | 62  | 1 | 15 |
| 36 | 395 | GlcNAcb1-2Mana1-3(Galb1-4GlcNAcb1-2Mana1-6)Manb1-4GlcNAcb1-4GlcNAc-Sp12                             | 8246  | 42 | 474  | 2  | 42  | 1 | 15 |
| 37 | 144 | Galb1-4GlcNAcb1-3Galb1-4(Fuca1-3)GlcNAcb1-3Galb1-4(Fuca1-3)GlcNAcb-Sp0                              | 5335  | 27 | 3634 | 13 | 146 | 2 | 14 |
| 38 | 282 | Neu5Aca2-3Galb1-4GlcNAcb1-3Galb1-3GlcNAcb-Sp0                                                       | 6993  | 36 | 1089 | 4  | 100 | 2 | 14 |
| 39 | 70  | Fuca1-2Galb1-4GlcNAcb1-3Galb1-4GlcNAcb1-3Galb1-4GlcNAcb-Sp0                                         | 7103  | 36 | 899  | 3  | 87  | 1 | 14 |
| 40 | 131 | Galb1-3GlcNAcb1-3Galb1-4Glc-Sp10                                                                    | 7036  | 36 | 892  | 3  | 86  | 1 | 14 |
| 41 | 104 | Gala1-3Galb1-4GlcNAcb-Sp8                                                                           | 7028  | 36 | 792  | 3  | 100 | 2 | 13 |
| 42 | 237 | Neu5Aca2-3Galb1-4GlcNAcb1-3Galb1-4GlcNAcb-Sp0                                                       | 4613  | 24 | 3107 | 11 | 356 | 5 | 13 |
| 43 | 315 | Neu5Aca2-3Galb1-4GlcNAcb1-2Mana1-3(Neu5Aca2-6Galb1-4GlcNAcb1-2Mana1-6)Manb1-4GlcNAcb1-4GlcNAcb-Sp12 | 5005  | 26 | 3102 | 11 | 153 | 2 | 13 |
| 44 | 26  | [3OSO3]Galb1-4Glc-Sp8                                                                               | 5854  | 30 | 1579 | 6  | 94  | 1 | 12 |
| 45 | 115 | Galb1-3(Fuca1-4)GlcNAcb1-3Galb1-4GlcNAcb-Sp0                                                        | 6305  | 32 | 967  | 3  | 40  | 1 | 12 |
| 46 | 276 | Galb1-3GlcNAcb1-3Galb1-3GlcNAcb-Sp0                                                                 | 6432  | 33 | 257  | 1  | 65  | 1 | 12 |
| 47 | 186 | KDNa2-3Galb1-3GlcNAcb-Sp0                                                                           | 5839  | 30 | 958  | 3  | 73  | 1 | 11 |
| 48 | 348 | Galb1-3GlcNAcb1-2Mana1-3(Galb1-3GlcNAcb1-2Mana1-6)Manb1-4GlcNAcb1-4(Fuca1-6)GlcNAcb-Sp22            | 6273  | 32 | 367  | 1  | 56  | 1 | 11 |
| 49 | 396 | Neu5Aca2-3Galb1-3GlcNAcb1-3GalNaca-Sp14                                                             | 6184  | 32 | 214  | 1  | 46  | 1 | 11 |
| 50 | 61  | Fuca1-2Galb1-3GlcNAcb1-3Galb1-4Glc-Sp10                                                             | 6220  | 32 | 76   | 0  | 29  | 0 | 11 |
| 51 | 323 | Neu5Ac(9Ac)a2-3Galb1-3GlcNAcb-Sp0                                                                   | 5561  | 29 | 765  | 3  | 77  | 1 | 11 |
| 52 | 393 | Neu5Aca2-3Galb1-3GlcNAcb1-2Mana1-3(Neu5Aca2-3Galb1-3GlcNAcb1-2Mana1-6)Manb1-4GlcNAcb1-4GlcNAc-Sp19  | 6220  | 32 | 23   | 0  | 22  | 0 | 11 |
| 53 | 280 | Galb1-4GlcNAcb1-3Galb1-3GlcNAcb-Sp0                                                                 | 5873  | 30 | 83   | 0  | 60  | 1 | 10 |
| 54 | 291 | Galb1-3Galb1-4GlcNAcb-Sp8                                                                           | 5454  | 28 | 195  | 1  | 176 | 3 | 10 |
| 55 | 198 | Neu5Aca2-6Galb1-4GlcNAcb1-2Mana1-3(Neu5Aca2-3Galb1-4GlcNAcb1-2Mana1-6)Manb1-4GlcNAcb1-4GlcNAcb-Sp12 | 5593  | 29 | 450  | 2  | 55  | 1 | 10 |

|    |     |                                     |      |    |      |   |     |   |    |
|----|-----|-------------------------------------|------|----|------|---|-----|---|----|
| 56 | 130 | Galb1-3GlcNAcb1-3Galb1-4GlcNAcb-Sp0 | 4408 | 23 | 1823 | 7 | 122 | 2 | 10 |
| 57 | 403 | Galb1-3GlcNAcb1-6Galb1-4GlcNAcb-Sp0 | 5407 | 28 | 275  | 1 | 98  | 1 | 10 |
| 58 | 257 | Neu5Gca2-3Galb1-4GlcNAcb-Sp0        | 5262 | 27 | 332  | 1 | 82  | 1 | 10 |
| 59 | 404 | Galb1-3GlcNAca1-6Galb1-4GlcNAcb-Sp0 | 4983 | 26 | 370  | 1 | 168 | 3 | 10 |
| 60 | 225 | Neu5Aca2-3Galb1-3GlcNAcb-Sp8        | 4694 | 24 | 572  | 2 | 162 | 2 | 10 |

**Supplemental Table 3  
Concentration Dependent Ranking Analysis of Canine Galectin 2**

| Order | No. | Glycan Structure                                                                                                         | Galectin Concentration |      | 50 µg/ml |      | 5 µg/ml |     | *AVG RANK |
|-------|-----|--------------------------------------------------------------------------------------------------------------------------|------------------------|------|----------|------|---------|-----|-----------|
|       |     |                                                                                                                          | RFU <sub>Max</sub>     |      | 11487    |      | 2615    |     |           |
|       |     |                                                                                                                          | RFU                    | Rank | RFU      | Rank |         |     |           |
| 1     | 367 | Gala1-3(Fuca1-2)Galb1-4GlcNAcb1-2Mana1-3(Gala1-3(Fuca1-2)Galb1-4GlcNAcb1-2Mana1-6)Manb1-4GlcNAcb1-4GlcNAcb-Sp20          | 11487                  | 100  | 2615     | 100  | 100     | 100 |           |
| 2     | 424 | Gala1-3(Fuca1-2)Galb1-4GlcNAcb1-2Mana1-3(Gala1-3(Fuca1-2)Galb1-4GlcNAcb1-2Mana1-6)Manb1-4GlcNAcb1-4(Fuca1-6)GlcNAcb-Sp20 | 6457                   | 56   | 1318     | 50   | 53      |     |           |
| 3     | 299 | GlcAb1-3GlcNAcb-Sp8                                                                                                      | 561                    | 5    | 160      | 6    | 5       |     |           |
| 4     | 37  | [4OSO3]Galb1-4GlcNAcb-Sp8                                                                                                | 6                      | 0    | 5        | 0    | 0       |     |           |
| 5     | 357 | Fuca1-2Galb1-4GlcNAcb1-2Mana1-3(Fuca1-2Galb1-4GlcNAcb1-2Mana1-6)Manb1-4GlcNAcb1-4GlcNAcb-Sp20                            | 124                    | 1    | 41       | 2    | 1       |     |           |
| 6     | 374 | Neu5Aca2-3Galb1-4(Fuca1-3)GlcNAcb1-3GalNAca-Sp14                                                                         | 34                     | 0    | 22       | 1    | 1       |     |           |
| 7     | 337 | GlcNAca1-4Galb1-4GlcNAcb1-3Galb1-4(Fuca1-3)GlcNAcb1-3Galb1-4(Fuca1-3)GlcNAcb-Sp0                                         | 79                     | 1    | 9        | 0    | 1       |     |           |
| 8     | 131 | Galb1-3GalNAca-Sp8                                                                                                       | 11                     | 0    | 7        | 0    | 0       |     |           |

\*Average Rank based on 2 concentrations due to low RFU values at 0.5 µg/ml

**Supplemental Table 4  
Concentration Dependent Ranking Analysis of Canine Galectin 3**

| Order | No. | Glycan Structure                                                                                                      | Galectin Concentration |     |         |     |           |     | AVG RANK |
|-------|-----|-----------------------------------------------------------------------------------------------------------------------|------------------------|-----|---------|-----|-----------|-----|----------|
|       |     |                                                                                                                       | 10 µg/ml               |     | 1 µg/ml |     | 0.1 µg/ml |     |          |
|       |     |                                                                                                                       | RFU <sub>Max</sub>     | RFU | Rank    | RFU | Rank      | RFU |          |
| 1     | 366 | Gala1-3(Fuca1-2)Galb1-4GlcNAcb1-2Mana1-3(Gala1-3(Fuca1-2)Galb1-4GlcNAcb1-2Mana1-6)Manb1-4GlcNAcb1-4GlcNAcb-Sp20       | 32174                  | 98  | 23605   | 100 | 3378      | 100 | 99       |
| 2     | 365 | GalNAca1-3(Fuca1-2)Galb1-4GlcNAcb1-2Mana1-3(GalNAca1-3(Fuca1-2)Galb1-4GlcNAcb1-2Mana1-6)Manb1-4GlcNAcb1-4GlcNAcb-Sp20 | 32273                  | 99  | 22288   | 94  | 3271      | 97  | 97       |
| 3     | 330 | GalNAca1-3(Fuca1-2)Galb1-4GlcNAcb1-3Galb1-4GlcNAcb1-3Galb1-4GlcNAcb-Sp0                                               | 32709                  | 100 | 19839   | 84  | 2542      | 75  | 86       |
| 4     | 326 | Neu5Aca2-6Galb1-4GlcNAcb1-3Galb1-4GlcNAcb1-3Galb1-4GlcNAcb-Sp0                                                        | 29963                  | 92  | 16252   | 69  | 1193      | 35  | 65       |
| 5     | 145 | Galb1-4GlcNAcb1-3Galb1-4GlcNAcb1-3Galb1-4GlcNAcb-Sp0                                                                  | 23866                  | 73  | 19984   | 85  | 1007      | 30  | 62       |
| 6     | 332 | GlcNAca1-4Galb1-4GlcNAcb1-3Galb1-4GlcNAcb1-3Galb1-4GlcNAcb-Sp0                                                        | 23323                  | 71  | 15367   | 65  | 1345      | 40  | 59       |
| 7     | 329 | GalNAca1-3(Fuca1-2)Galb1-4GlcNAcb1-3Galb1-4GlcNAcb-Sp0                                                                | 20301                  | 62  | 12792   | 54  | 1517      | 45  | 54       |
| 8     | 140 | Galb1-4GalNAca1-3(Fuca1-2)Galb1-4GlcNAcb-Sp8                                                                          | 26954                  | 82  | 8720    | 37  | 243       | 7   | 42       |
| 9     | 324 | Neu5Aca2-6Galb1-4GlcNAcb1-3Galb1-3GlcNAcb-Sp0                                                                         | 26679                  | 82  | 7327    | 31  | 216       | 6   | 40       |
| 10    | 70  | Fuca1-2Galb1-4GlcNAcb1-3Galb1-4GlcNAcb1-3Galb1-4GlcNAcb-Sp0                                                           | 26024                  | 80  | 5676    | 24  | 384       | 11  | 38       |
| 11    | 246 | Neu5Aca2-6Galb1-4GlcNAcb1-3Galb1-4GlcNAcb-Sp0                                                                         | 27267                  | 83  | 6577    | 28  | 71        | 2   | 38       |
| 12    | 146 | Galb1-4GlcNAcb1-3Galb1-4GlcNAcb-Sp0                                                                                   | 21850                  | 67  | 8681    | 37  | 225       | 7   | 37       |
| 13    | 376 | Galb1-3GalNAca1-3(Fuca1-2)Galb1-4GlcNAcb-Sp14                                                                         | 24413                  | 75  | 6790    | 29  | 180       | 5   | 36       |
| 14    | 96  | Gala1-3(Fuca1-2)Galb1-4GlcNAcb-Sp0                                                                                    | 23898                  | 73  | 6969    | 30  | 178       | 5   | 36       |
| 15    | 80  | GalNAca1-3(Fuca1-2)Galb1-4GlcNAcb-Sp0                                                                                 | 23783                  | 73  | 5839    | 25  | 155       | 5   | 34       |
| 16    | 358 | Gala1-3Galb1-4GlcNAcb1-2Mana1-3(Gala1-3Galb1-4GlcNAcb1-2Mana1-6)Manb1-4GlcNAcb1-4GlcNAcb-Sp20                         | 22899                  | 70  | 4470    | 19  | 34        | 1   | 30       |
| 17    | 69  | Fuca1-2Galb1-4GlcNAcb1-3Galb1-4GlcNAcb-Sp0                                                                            | 19583                  | 60  | 3803    | 16  | 60        | 2   | 26       |
| 18    | 337 | GlcNAca1-4Galb1-4GlcNAcb1-3Galb1-4GlcNAcb-Sp0                                                                         | 18011                  | 55  | 3687    | 16  | 167       | 5   | 25       |
| 19    | 81  | GalNAca1-3(Fuca1-2)Galb1-4GlcNAcb-Sp8                                                                                 | 16814                  | 51  | 4340    | 18  | 122       | 4   | 24       |
| 20    | 280 | Galb1-4GlcNAcb1-3Galb1-3GlcNAcb-Sp0                                                                                   | 18541                  | 57  | 3099    | 13  | 42        | 1   | 24       |
| 21    | 234 | Neu5Aca2-3Galb1-4GlcNAcb1-3Galb1-4GlcNAcb1-3Galb1-4GlcNAcb-Sp0                                                        | 16523                  | 51  | 3810    | 16  | 75        | 2   | 23       |
| 22    | 369 | Gala1-3(Fuca1-2)Galb1-3GlcNAcb1-2Mana1-3(Gala1-3(Fuca1-2)Galb1-3GlcNAcb1-2Mana1-6)Manb1-4GlcNAcb1-4GlcNAcb-Sp20       | 14859                  | 45  | 2361    | 10  | 21        | 1   | 19       |
| 23    | 223 | Neu5Aca2-3Galb1-3GlcNAcb1-3Galb1-4GlcNAcb-Sp0                                                                         | 14096                  | 43  | 1586    | 7   | 35        | 1   | 17       |
| 24    | 148 | Galb1-4GlcNAcb1-3Galb1-4GlcNAcb-Sp8                                                                                   | 13659                  | 42  | 1979    | 8   | 12        | 0   | 17       |
| 25    | 94  | Gala1-3(Fuca1-2)Galb1-3GlcNAcb-Sp0                                                                                    | 12980                  | 40  | 1330    | 6   | 70        | 2   | 16       |
| 26    | 165 | GlcNAcb1-3Galb1-4GlcNAcb1-3Galb1-4GlcNAcb-Sp0                                                                         | 12756                  | 39  | 1564    | 7   | 41        | 1   | 16       |
| 27    | 281 | Neu5Aca2-3Galb1-3GlcNAcb1-3Galb1-3GlcNAcb-Sp0                                                                         | 10619                  | 32  | 1451    | 6   | 33        | 1   | 13       |
| 28    | 33  | [3OSO3]Galb1-4[6OSO3]GlcNAcb-Sp8                                                                                      | 10146                  | 31  | 1519    | 6   | 54        | 2   | 13       |
| 29    | 237 | Neu5Aca2-3Galb1-4GlcNAcb1-3Galb1-4GlcNAcb-Sp0                                                                         | 7659                   | 23  | 728     | 3   | 28        | 1   | 9        |

**Supplemental Table 5**  
**Concentration Dependent Ranking Analysis of Canine Galectin 4**

| Order | No. | Glycan Structure                                                                                                     | Galectin Concentration |      | 50 µg/ml |      | 5 µg/ml |      | 0.5 µg/ml |  | AVG RANK |
|-------|-----|----------------------------------------------------------------------------------------------------------------------|------------------------|------|----------|------|---------|------|-----------|--|----------|
|       |     |                                                                                                                      | RFU <sub>Max</sub>     |      | 27558    |      | 27260   |      | 19799     |  |          |
|       |     |                                                                                                                      | RFU                    | Rank | RFU      | Rank | RFU     | Rank |           |  |          |
| 1     | 376 | Galb1-3GalNAca1-3(Fuca1-2)Galb1-4Glc-Sp0                                                                             | 27558                  | 100  | 27260    | 100  | 14847   | 75   | 92        |  |          |
| 2     | 101 | Gala1-3(Fuca1-2)Galb1-4Glc-Sp0                                                                                       | 8614                   | 31   | 19118    | 70   | 19799   | 100  | 67        |  |          |
| 3     | 330 | GalNAca1-3(Fuca1-2)Galb1-4GlcNAcb1-3Galb1-4GlcNAcb-Sp0                                                               | 26021                  | 94   | 18963    | 70   | 5501    | 28   | 64        |  |          |
| 4     | 84  | GalNAca1-3(Fuca1-2)Galb1-4Glc-Sp0                                                                                    | 9900                   | 36   | 15614    | 57   | 10062   | 51   | 48        |  |          |
| 5     | 366 | GalNAca1-3(Fuca1-2)Galb1-4GlcNAcb1-2Mana1-3(GalNAca1-3(Fuca1-2)Galb1-4GlcNAcb1-2Mana1-6)Manb1-4GlcNAcb1-4GlcNAcb-Sp0 | 18797                  | 68   | 8936     | 33   | 916     | 5    | 35        |  |          |
| 6     | 83  | GalNAca1-3(Fuca1-2)Galb1-4GlcNAcb-Sp8                                                                                | 12613                  | 46   | 13889    | 51   | 1036    | 5    | 34        |  |          |
| 7     | 148 | Galb1-4GalNAca1-3(Fuca1-2)Galb1-4GlcNAcb-Sp8                                                                         | 11344                  | 41   | 7334     | 27   | 3743    | 19   | 29        |  |          |
| 8     | 367 | Gala1-3(Fuca1-2)Galb1-4GlcNAcb1-2Mana1-3(Gala1-3(Fuca1-2)Galb1-4GlcNAcb1-2Mana1-6)Manb1-4GlcNAcb1-4GlcNAcb-Sp2       | 17293                  | 63   | 4843     | 18   | 202     | 1    | 27        |  |          |
| 9     | 377 | Galb1-3GalNAca1-3(Fuca1-2)Galb1-4GlcNAc-Sp0                                                                          | 11401                  | 41   | 6725     | 25   | 1414    | 7    | 24        |  |          |
| 10    | 98  | Gala1-3(Fuca1-2)Galb1-3GlcNAcb-Sp0                                                                                   | 16077                  | 58   | 2492     | 9    | 464     | 2    | 23        |  |          |
| 11    | 100 | Gala1-3(Fuca1-2)Galb1-4GlcNAc-Sp0                                                                                    | 9768                   | 35   | 2669     | 10   | 1184    | 6    | 17        |  |          |
| 12    | 25  | [3OSO3]Galb1-4[6OSO3]Glc-Sp8                                                                                         | 5363                   | 19   | 4066     | 15   | 74      | 0    | 12        |  |          |
| 13    | 370 | Gala1-3(Fuca1-2)Galb1-3GlcNAcb1-2Mana1-3(Gala1-3(Fuca1-2)Galb1-3GlcNAcb1-2Mana1-6)Manb1-4GlcNAcb1-4GlcNAcb-Sp2       | 6216                   | 23   | 1416     | 5    | 240     | 1    | 10        |  |          |
| 14    | 82  | GalNAca1-3(Fuca1-2)Galb1-4GlcNAcb-Sp0                                                                                | 3201                   | 12   | 3946     | 14   | 514     | 3    | 10        |  |          |

**Supplemental Table 6  
Concentration Dependent Ranking Analysis of Canine Galectin 7**

| Order | No. | Glycan Structure                                                                                                     | Galectin Concentration |      |         |      |           |      | AVG RANK |
|-------|-----|----------------------------------------------------------------------------------------------------------------------|------------------------|------|---------|------|-----------|------|----------|
|       |     |                                                                                                                      | 10 µg/ml               |      | 1 µg/ml |      | 0.1 µg/ml |      |          |
|       |     |                                                                                                                      | RFU <sub>Max</sub>     | Rank | RFU     | Rank | RFU       | Rank |          |
| 1     | 69  | Fuca1-2Galb1-4GlcNAcb1-3Galb1-4GlcNAcb-Sp0                                                                           | 44660                  | 100  | 34633   | 100  | 32917     | 89   | 96       |
| 2     | 70  | Fuca1-2Galb1-4GlcNAcb1-3Galb1-4GlcNAcb1-3Galb1-4GlcNAcb-Sp0                                                          | 38512                  | 86   | 28389   | 82   | 36907     | 100  | 89       |
| 3     | 66  | Fuca1-2Galb1-4(Fuca1-3)GlcNAcb1-3Galb1-4(Fuca1-3)GlcNAcb1-3Galb1-4(Fuca1-3)GlcNAcb-Sp0                               | 34903                  | 78   | 30469   | 88   | 28061     | 76   | 81       |
| 4     | 145 | Galb1-4GlcNAcb1-3Galb1-4GlcNAcb1-3Galb1-4GlcNAcb-Sp0                                                                 | 31534                  | 71   | 18661   | 54   | 2586      | 7    | 44       |
| 5     | 329 | GalNAca1-3(Fuca1-2)Galb1-4GlcNAcb1-3Galb1-4GlcNAcb-Sp0                                                               | 29988                  | 67   | 13593   | 39   | 3044      | 8    | 38       |
| 6     | 324 | Neu5Aca2-6Galb1-4GlcNAcb1-3Galb1-3GlcNAcb-Sp0                                                                        | 28557                  | 64   | 12418   | 36   | 2112      | 6    | 35       |
| 7     | 326 | Neu5Aca2-6Galb1-4GlcNAcb1-3Galb1-4GlcNAcb1-3Galb1-4GlcNAcb-Sp0                                                       | 31032                  | 69   | 9704    | 28   | 1257      | 3    | 34       |
| 8     | 330 | GalNAca1-3(Fuca1-2)Galb1-4GlcNAcb1-3Galb1-4GlcNAcb1-3Galb1-4GlcNAcb-Sp0                                              | 30456                  | 68   | 8711    | 25   | 599       | 2    | 32       |
| 9     | 332 | GlcNAca1-4Galb1-4GlcNAcb1-3Galb1-4GlcNAcb1-3Galb1-4GlcNAcb-Sp0                                                       | 30318                  | 68   | 6232    | 18   | 728       | 2    | 29       |
| 10    | 365 | GalNAca1-3(Fuca1-2)Galb1-4GlcNAcb1-2Mana1-3(GalNAca1-3(Fuca1-2)Galb1-4GlcNAcb1-2Mana1-6)Manb1-4GlcNAcb1-4GlcNAcb-Sp0 | 27016                  | 60   | 6878    | 20   | 264       | 1    | 27       |
| 11    | 280 | Galb1-4GlcNAcb1-3Galb1-3GlcNAcb-Sp0                                                                                  | 22709                  | 51   | 6693    | 19   | 418       | 1    | 24       |
| 12    | 146 | Galb1-4GlcNAcb1-3Galb1-4GlcNAcb-Sp0                                                                                  | 24505                  | 55   | 4412    | 13   | 302       | 1    | 23       |
| 13    | 148 | Galb1-4GlcNAcb1-3Galb1-4Glc-Sp8                                                                                      | 20483                  | 46   | 4666    | 13   | 226       | 1    | 20       |
| 14    | 327 | Gala1-4Galb1-4GlcNAcb1-3Galb1-4Glc-Sp0                                                                               | 22399                  | 50   | 755     | 2    | 173       | 0    | 18       |
| 15    | 246 | Neu5Aca2-6Galb1-4GlcNAcb1-3Galb1-4GlcNAcb-Sp0                                                                        | 16896                  | 38   | 3737    | 11   | 200       | 1    | 16       |
| 16    | 147 | Galb1-4GlcNAcb1-3Galb1-4Glc-Sp0                                                                                      | 19614                  | 44   | 1430    | 4    | 334       | 1    | 16       |
| 17    | 337 | GlcNAca1-4Galb1-4GlcNAcb1-3Galb1-4GlcNAcb-Sp0                                                                        | 19590                  | 44   | 469     | 1    | 213       | 1    | 15       |
| 18    | 366 | Gala1-3(Fuca1-2)Galb1-4GlcNAcb1-2Mana1-3(Gala1-3(Fuca1-2)Galb1-4GlcNAcb1-2Mana1-6)Manb1-4GlcNAcb1-4GlcNAcb-Sp0       | 18378                  | 41   | 1374    | 4    | 114       | 0    | 15       |
| 19    | 328 | GalNAcb1-3Gala1-4Galb1-4GlcNAcb1-3Galb1-4Glc-Sp0                                                                     | 12560                  | 28   | 3668    | 11   | 131       | 0    | 13       |
| 20    | 379 | Galb1-3GlcNAcb1-3(Galb1-3GlcNAcb1-3Galb1-4GlcNAcb1-6)Galb1-4Glc-Sp0                                                  | 10213                  | 23   | 249     | 1    | 133       | 0    | 8        |



**Supplemental Table 7**  
**Concentration Dependent Ranking Analysis of Canine Galectin 8**

| Order | No. | Glycan Structure                                                                                                     | Galectin Concentration |         |           | AVG RANK |         |           |          |
|-------|-----|----------------------------------------------------------------------------------------------------------------------|------------------------|---------|-----------|----------|---------|-----------|----------|
|       |     |                                                                                                                      | RFU <sub>Max</sub>     |         | RFU       |          | RFU     |           | AVG RANK |
|       |     |                                                                                                                      | 10 µg/ml               | 1 µg/ml | 0.1 µg/ml | 10 µg/ml | 1 µg/ml | 0.1 µg/ml | AVG RANK |
|       |     |                                                                                                                      | 42783                  | 32403   | 7384      |          |         |           |          |
|       |     |                                                                                                                      | RFU                    | Rank    | RFU       | Rank     | RFU     | Rank      | AVG RANK |
| 1     | 234 | Neu5Aca2-3Galb1-4GlcNAcb1-3Galb1-4GlcNAcb1-3Galb1-4GlcNAcb-Sp0                                                       | 40978                  | 96      | 32403     | 100      | 7384    | 100       | 99       |
| 2     | 365 | GalNAca1-3(Fuca1-2)Galb1-4GlcNAcb1-2Mana1-3(GalNAca1-3(Fuca1-2)Galb1-4GlcNAcb1-2Mana1-6)Manb1-4GlcNAcb1-4GlcNAcb-Sp0 | 41043                  | 96      | 31109     | 96       | 2953    | 40        | 77       |
| 3     | 330 | GalNAca1-3(Fuca1-2)Galb1-4GlcNAcb1-3Galb1-4GlcNAcb1-3Galb1-4GlcNAcb-Sp0                                              | 36698                  | 86      | 32173     | 99       | 1058    | 14        | 66       |
| 4     | 165 | GlcNAcb1-3Galb1-4GlcNAcb1-3Galb1-4GlcNAcb-Sp0                                                                        | 32179                  | 75      | 24717     | 76       | 2745    | 37        | 63       |
| 5     | 332 | GlcNAca1-4Galb1-4GlcNAcb1-3Galb1-4GlcNAcb1-3Galb1-4GlcNAcb-Sp0                                                       | 33626                  | 79      | 24590     | 76       | 2152    | 29        | 61       |
| 6     | 145 | Galb1-4GlcNAcb1-3Galb1-4GlcNAcb1-3Galb1-4GlcNAcb-Sp0                                                                 | 35458                  | 83      | 25624     | 79       | 924     | 13        | 58       |
| 7     | 369 | Gala1-3(Fuca1-2)Galb1-3GlcNAcb1-2Mana1-3(Gala1-3(Fuca1-2)Galb1-3GlcNAcb1-2Mana1-6)Manb1-4GlcNAcb1-4GlcNAcb-Sp2       | 31612                  | 74      | 24700     | 76       | 685     | 9         | 53       |
| 8     | 78  | GalNAca1-3(Fuca1-2)Galb1-3GlcNAcb-Sp0                                                                                | 34458                  | 81      | 21532     | 66       | 636     | 9         | 52       |
| 9     | 81  | GalNAca1-3(Fuca1-2)Galb1-4GlcNAcb-Sp8                                                                                | 42783                  | 100     | 15677     | 48       | 472     | 6         | 52       |
| 10    | 329 | GalNAca1-3(Fuca1-2)Galb1-4GlcNAcb1-3Galb1-4GlcNAcb-Sp0                                                               | 30739                  | 72      | 22388     | 69       | 619     | 8         | 50       |
| 11    | 375 | Galb1-3GalNAca1-3(Fuca1-2)Galb1-4Glc-Sp14                                                                            | 28882                  | 68      | 21945     | 68       | 398     | 5         | 47       |
| 12    | 366 | Gala1-3(Fuca1-2)Galb1-4GlcNAcb1-2Mana1-3(Gala1-3(Fuca1-2)Galb1-4GlcNAcb1-2Mana1-6)Manb1-4GlcNAcb1-4GlcNAcb-Sp2       | 29904                  | 70      | 19706     | 61       | 175     | 2         | 44       |
| 13    | 368 | GalNAca1-3(Fuca1-2)Galb1-3GlcNAcb1-2Mana1-3(GalNAca1-3(Fuca1-2)Galb1-3GlcNAcb1-2Mana1-6)Manb1-4GlcNAcb1-4GlcNAcb-Sp0 | 32446                  | 76      | 17635     | 54       | 187     | 3         | 44       |
| 14    | 376 | Galb1-3GalNAca1-3(Fuca1-2)Galb1-4GlcNAc-Sp14                                                                         | 27371                  | 64      | 20091     | 62       | 159     | 2         | 43       |
| 15    | 80  | GalNAca1-3(Fuca1-2)Galb1-4GlcNAcb-Sp0                                                                                | 31371                  | 73      | 9755      | 30       | 156     | 2         | 35       |
| 16    | 97  | Gala1-3(Fuca1-2)Galb1-4Glc-Sp0                                                                                       | 20909                  | 49      | 15108     | 47       | 740     | 10        | 35       |
| 17    | 147 | Galb1-4GlcNAcb1-3Galb1-4Glc-Sp0                                                                                      | 25690                  | 60      | 9280      | 29       | 1224    | 17        | 35       |
| 18    | 70  | Fuca1-2Galb1-4GlcNAcb1-3Galb1-4GlcNAcb1-3Galb1-4GlcNAcb-Sp0                                                          | 32258                  | 75      | 3794      | 12       | 372     | 5         | 31       |
| 19    | 148 | Galb1-4GlcNAcb1-3Galb1-4Glc-Sp8                                                                                      | 23983                  | 56      | 9553      | 29       | 339     | 5         | 30       |
| 20    | 94  | Gala1-3(Fuca1-2)Galb1-3GlcNAcb-Sp0                                                                                   | 26432                  | 62      | 8037      | 25       | 135     | 2         | 29       |
| 21    | 82  | GalNAca1-3(Fuca1-2)Galb1-4Glc-Sp0                                                                                    | 22925                  | 54      | 9424      | 29       | 159     | 2         | 28       |
| 22    | 335 | GlcNAca1-4Galb1-4GlcNAcb1-3Galb1-4Glc-Sp0                                                                            | 25181                  | 59      | 6844      | 21       | 239     | 3         | 28       |
| 23    | 28  | [3OSO3]Galb1-4[6OSO3]Glc-Sp8                                                                                         | 16479                  | 39      | 10141     | 31       | 637     | 9         | 26       |
| 24    | 96  | Gala1-3(Fuca1-2)Galb1-4GlcNAc-Sp0                                                                                    | 24947                  | 58      | 3926      | 12       | 135     | 2         | 24       |
| 25    | 327 | Gala1-4Galb1-4GlcNAcb1-3Galb1-4Glc-Sp0                                                                               | 22150                  | 52      | 3264      | 10       | 113     | 2         | 21       |

|    |     |                                                                                               |       |    |      |    |     |   |    |
|----|-----|-----------------------------------------------------------------------------------------------|-------|----|------|----|-----|---|----|
| 26 | 140 | Galb1-4GalNAca1-3(Fuca1-2)Galb1-4GlcNAcb-Sp8                                                  | 24123 | 56 | 1764 | 5  | 62  | 1 | 21 |
| 27 | 251 | Neu5Aca2-8Neu5Aca2-3Galb1-4Glc-Sp0                                                            | 18269 | 43 | 4846 | 15 | 325 | 4 | 21 |
| 28 | 387 | Fuca1-2Galb1-3GalNAca1-3(Fuca1-2)Galb1-4GlcNAcb-Sp0                                           | 23187 | 54 | 964  | 3  | 289 | 4 | 20 |
| 29 | 390 | GalNAca1-3(Fuca1-2)Galb1-3GalNAca1-3(Fuca1-2)Galb1-4GlcNAcb-Sp0                               | 22578 | 53 | 1331 | 4  | 142 | 2 | 20 |
| 30 | 280 | Galb1-4GlcNAcb1-3Galb1-3GlcNAcb-Sp0                                                           | 21803 | 51 | 1814 | 6  | 132 | 2 | 19 |
| 31 | 27  | [3OSO3]Galb1-4[6OSO3]Glc-Sp0                                                                  | 15897 | 37 | 5770 | 18 | 242 | 3 | 19 |
| 32 | 211 | Neu5Aca2-3(Neu5Aca2-3Galb1-3GalNAcb1-4)Galb1-4Glc-Sp0                                         | 16241 | 38 | 4634 | 14 | 115 | 2 | 18 |
| 33 | 399 | GalNAca1-3GalNAcb1-3Gala1-4Galb1-4GlcNAcb-Sp0                                                 | 21637 | 51 | 75   | 0  | 194 | 3 | 18 |
| 34 | 326 | Neu5Aca2-6Galb1-4GlcNAcb1-3Galb1-4GlcNAcb1-3Galb1-4GlcNAcb-Sp0                                | 20528 | 48 | 1389 | 4  | 67  | 1 | 18 |
| 35 | 386 | Fuca1-2Galb1-3GalNAca1-3(Fuca1-2)Galb1-4Glc-Sp0                                               | 20468 | 48 | 78   | 0  | 93  | 1 | 16 |
| 36 | 61  | Fuca1-2Galb1-3GlcNAcb1-3Galb1-4Glc-Sp10                                                       | 18146 | 42 | 100  | 0  | 171 | 2 | 15 |
| 37 | 69  | Fuca1-2Galb1-4GlcNAcb1-3Galb1-4GlcNAcb-Sp0                                                    | 17559 | 41 | 578  | 2  | 160 | 2 | 15 |
| 38 | 328 | GalNAcb1-3Gala1-4Galb1-4GlcNAcb1-3Galb1-4Glc-Sp0                                              | 13028 | 30 | 2320 | 7  | 106 | 1 | 13 |
| 39 | 358 | Gala1-3Galb1-4GlcNAcb1-2Mana1-3(Gala1-3Galb1-4GlcNAcb1-2Mana1-6)Manb1-4GlcNAcb1-4GlcNAcb-Sp20 | 15845 | 37 | 26   | 0  | 110 | 1 | 13 |
| 40 | 355 | Fuca1-2Galb1-3GlcNAcb1-2Mana1-3(Fuca1-2Galb1-3GlcNAcb1-2Mana1-6)Manb1-4GlcNAcb1-4GlcNAcb-Sp20 | 9477  | 22 | 123  | 0  | 543 | 7 | 10 |
| 41 | 225 | Neu5Aca2-3Galb1-3GlcNAcb-Sp8                                                                  | 9939  | 23 | 1452 | 4  | 150 | 2 | 10 |

**Supplemental Table 8**  
**Concentration Dependent Ranking Analysis of Canine Galectin 9N**

| Order | No. | Glycan Structure                                                                                                               | Galectin Concentration |      |         |      |           |      | AVG RANK |
|-------|-----|--------------------------------------------------------------------------------------------------------------------------------|------------------------|------|---------|------|-----------|------|----------|
|       |     |                                                                                                                                | 5 µg/ml                |      | 1 µg/ml |      | 0.1 µg/ml |      |          |
|       |     |                                                                                                                                | RFU <sub>Max</sub>     | Rank | RFU     | Rank | RFU       | Rank |          |
| 1     | 369 | GalNAcα1-3(Fuca1-2)Galβ1-4GlcNAcβ1-2Manα1-3(GalNAcα1-3(Fuca1-2)Galβ1-4GlcNAcβ1-2Manα1-6)Manβ1-4GlcNAcβ1-4GlcNAcβ-Sp20          | 25949                  | 100  | 5533    | 59   | 1244      | 100  | 86       |
| 2     | 28  | [3OSO3]Galβ1-3GalNAcα-Sp8                                                                                                      | 18156                  | 70   | 3477    | 37   | 775       | 62   | 56       |
| 3     | 26  | [3OSO3]Galβ1-4[6OSO3]Glcβ-Sp8                                                                                                  | 14663                  | 57   | 3149    | 33   | 838       | 67   | 52       |
| 4     | 333 | GalNAcα1-3(Fuca1-2)Galβ1-4GlcNAcβ1-3Galβ1-4GlcNAcβ-Sp0                                                                         | 19450                  | 75   | 5337    | 57   | 202       | 16   | 49       |
| 5     | 379 | Galβ1-3GalNAcα1-3(Fuca1-2)Galβ1-4Glc-Sp0                                                                                       | 12617                  | 49   | 3754    | 40   | 147       | 12   | 33       |
| 6     | 400 | GalNAcα1-3GalNAcβ1-3Galα1-4Galβ1-4GlcNAcβ-Sp0                                                                                  | 11292                  | 44   | 3149    | 33   | 44        | 4    | 27       |
| 7     | 334 | GalNAcα1-3(Fuca1-2)Galβ1-4GlcNAcβ1-3Galβ1-4GlcNAcβ1-3Galβ1-4GlcNAcβ-Sp0                                                        | 11428                  | 44   | 2288    | 24   | 114       | 9    | 26       |
| 8     | 87  | GalNAcα1-3(Fuca1-2)Galβ1-4Glcβ-Sp0                                                                                             | 10716                  | 41   | 2639    | 28   | 90        | 7    | 25       |
| 9     | 414 | GalNAcα1-3GalNAcβ1-3Galα1-4Galβ1-4Glcβ-Sp0                                                                                     | 9236                   | 36   | 2694    | 29   | 31        | 2    | 22       |
| 10    | 25  | [3OSO3]Galβ1-4[6OSO3]Glcβ-Sp0                                                                                                  | 5766                   | 22   | 1553    | 16   | 284       | 23   | 20       |
| 11    | 456 | GalNAcα1-3(Fuca1-2)Galβ1-4GlcNAcβ1-2Manα1-6(GalNAcα1-3(Fuca1-2)Galβ1-4GlcNAcβ1-2Manα1-3)Manβ1-4GlcNAcβ1-4(Fuca1-6)GlcNAcβ-Sp20 | 8475                   | 33   | 1233    | 13   | 24        | 2    | 16       |
| 12    | 370 | Galα1-3(Fuca1-2)Galβ1-4GlcNAcβ1-2Manα1-3(Galα1-3(Fuca1-2)Galβ1-4GlcNAcβ1-2Manα1-6)Manβ1-4GlcNAcβ1-4GlcNAcβ-Sp20                | 6161                   | 24   | 1524    | 16   | 12        | 1    | 14       |
| 13    | 380 | Galβ1-3GalNAcα1-3(Fuca1-2)Galβ1-4GlcNAc-Sp0                                                                                    | 6249                   | 24   | 1177    | 12   | 16        | 1    | 13       |
| 14    | 34  | [3OSO3]Galβ1-4[6OSO3]GlcNAcβ-Sp8                                                                                               | 4534                   | 17   | 1196    | 13   | 82        | 7    | 12       |
| 15    | 85  | GalNAcα1-3(Fuca1-2)Galβ1-4GlcNAcβ-Sp0                                                                                          | 5049                   | 19   | 1149    | 12   | 15        | 1    | 11       |
| 16    | 86  | GalNAcα1-3(Fuca1-2)Galβ1-4GlcNAcβ-Sp8                                                                                          | 4223                   | 16   | 1171    | 12   | 7         | 1    | 10       |

**Supplemental Table 9**  
**Concentration Dependent Ranking Analysis of Canine Galectin 9C**

| Order | No. | Glycan Structure                                                                                                         | Galectin Concentration |      |         |      |           |      | AVG RANK |
|-------|-----|--------------------------------------------------------------------------------------------------------------------------|------------------------|------|---------|------|-----------|------|----------|
|       |     |                                                                                                                          | 5 µg/ml                |      | 1 µg/ml |      | 0.1 µg/ml |      |          |
|       |     |                                                                                                                          | RFU <sub>Max</sub>     | Rank | RFU     | Rank | RFU       | Rank |          |
| 1     | 29  | [3OSO3]Galβ1-3GlcNAcβ-Sp0                                                                                                | 20597                  | 97   | 9436    | 100  | 3244      | 83   | 93       |
| 2     | 33  | [3OSO3]Galβ1-4[6OSO3]GlcNAcβ-Sp0                                                                                         | 18021                  | 85   | 9146    | 97   | 3357      | 86   | 89       |
| 3     | 34  | [3OSO3]Galβ1-4[6OSO3]GlcNAcβ-Sp8                                                                                         | 20275                  | 95   | 5527    | 59   | 3909      | 100  | 85       |
| 4     | 30  | [3OSO3]Galβ1-3GlcNAcβ-Sp8                                                                                                | 21247                  | 100  | 5601    | 59   | 3014      | 77   | 79       |
| 5     | 35  | [3OSO3]Galβ1-4GlcNAcβ-Sp0                                                                                                | 15734                  | 74   | 6103    | 65   | 2017      | 52   | 63       |
| 6     | 370 | Galα1-3(Fuca1-2)Galβ1-4GlcNAcβ1-2Mana1-3(Galα1-3(Fuca1-2)Galβ1-4GlcNAcβ1-2Mana1-6)Manβ1-4GlcNAcβ1-4GlcNAcβ-Sp20          | 15868                  | 75   | 6298    | 67   | 902       | 23   | 55       |
| 7     | 36  | [3OSO3]Galβ1-4GlcNAcβ-Sp8                                                                                                | 14201                  | 67   | 4521    | 48   | 1817      | 46   | 54       |
| 8     | 292 | Neu5Aca2-3Galβ1-3GlcNAcβ1-3Galβ1-3GlcNAcβ-Sp0                                                                            | 10794                  | 51   | 5300    | 56   | 1685      | 43   | 50       |
| 9     | 26  | [3OSO3]Galβ1-4[6OSO3]Glcβ-Sp8                                                                                            | 11425                  | 54   | 5007    | 53   | 1266      | 32   | 46       |
| 10    | 25  | [3OSO3]Galβ1-4[6OSO3]Glcβ-Sp0                                                                                            | 10512                  | 49   | 4827    | 51   | 928       | 24   | 41       |
| 11    | 245 | Neu5Aca2-3Galβ1-3GlcNAcβ1-3Galβ1-4GlcNAcβ-Sp0                                                                            | 10961                  | 52   | 4565    | 48   | 315       | 8    | 36       |
| 12    | 217 | [3OSO3]Galβ1-4(Fuca1-3)[6OSO3]GlcNAc-Sp8                                                                                 | 6536                   | 31   | 3415    | 36   | 480       | 12   | 26       |
| 13    | 287 | Galβ1-3GlcNAcβ1-3Galβ1-3GlcNAcβ-Sp0                                                                                      | 7018                   | 33   | 3115    | 33   | 316       | 8    | 25       |
| 14    | 24  | [3OSO3]Galβ1-4Glcβ-Sp8                                                                                                   | 6604                   | 31   | 3580    | 38   | 9         | 0    | 23       |
| 15    | 328 | Neu5Aca2-6Galβ1-4GlcNAcβ1-3Galβ1-3GlcNAcβ-Sp0                                                                            | 6006                   | 28   | 3169    | 34   | 7         | 0    | 21       |
| 16    | 373 | Galα1-3(Fuca1-2)Galβ1-3GlcNAcβ1-2Mana1-3(Galα1-3(Fuca1-2)Galβ1-3GlcNAcβ1-2Mana1-6)Manβ1-4GlcNAcβ1-4GlcNAcβ-Sp20          | 6186                   | 29   | 2265    | 24   | 129       | 3    | 19       |
| 17    | 426 | Galα1-3(Fuca1-2)Galβ1-4GlcNAcβ1-2Mana1-3(Galα1-3(Fuca1-2)Galβ1-4GlcNAcβ1-2Mana1-6)Manβ1-4GlcNAcβ1-4(Fuca1-6)GlcNAcβ-Sp12 | 3706                   | 17   | 1329    | 14   | 106       | 3    | 11       |
| 18    | 323 | Neu5Aca2-3Galβ1-4GlcNAcβ1-2Mana1-3(Neu5Aca2-3Galβ1-4GlcNAcβ1-2Mana1-6)Manβ1-4GlcNAcβ1-4GlcNAcβ-Sp12                      | 3593                   | 17   | 1343    | 14   | 51        | 1    | 11       |
| 19    | 452 | Galα1-3Fuca1-2Galβ1-4GlcNAcβ1-3(Galα1-3Fuca1-2Galβ1-4GlcNAcβ1-6)GalNAc-Sp14                                              | 3145                   | 15   | 1188    | 13   | 66        | 2    | 10       |
